# Supplementary material
Source: PubMed Central journal article supplement (PMC3778713)

### Supplementary table 1

*NRAS* primer sequences for successive cycles of enzymatic digestion of wild-type allele and hemi-nested PCR, to selectively amplify mutant allele in mosaic tissue.

| <b>Q61K mosaicism detection</b>                                                                                                                     | <b>Q61R mosaicism detection</b>                                    |
|-----------------------------------------------------------------------------------------------------------------------------------------------------|--------------------------------------------------------------------|
| <b>Forward primer:</b><br>5'TGTTTGTTGGACATACTGGATACAGC>G<br>TGG A3'                                                                                 | <b>Forward primer:</b><br>5'TGTTTGTTGGACATACTGGATACAGCTG<br>G>TA3' |
| <b>Reverse primers:</b><br>1. 5'GATAGAGCTTTTTAATTATGG3'<br>2. 5'GAGGTTACCACACTAGGGAA3'<br>3. 5'GAATCTTTATGGGGAAAT3'<br>4. 5'AAAGGATGATCTTTGTGTTCT3' | <b>Reverse primers:</b><br>as for Q61K                             |

### Supplementary figure 1

**A.** An example of forward sequence, showing improvement in detection of a Q61K heterozygous mutation (red arrows) after one cycle of enzymatic digestion of the wild-type allele. The black arrow indicates the position of site directed mutagenesis, introducing the recognition sequence for Hpy166II (GTNNAC).

**B.** Validation of the measurement of percentage of mosaicism used in this study. Percentage of mosaicism was measured in triplicate in samples of known percentage of *NRAS* Q61K mutation, produced by TA cloning of heterozygous samples. Correlation between mean measured and predicted percentages was high (two-tailed Pearson  $r^2 = 0.990$ ,  $p < 0.001$ ).

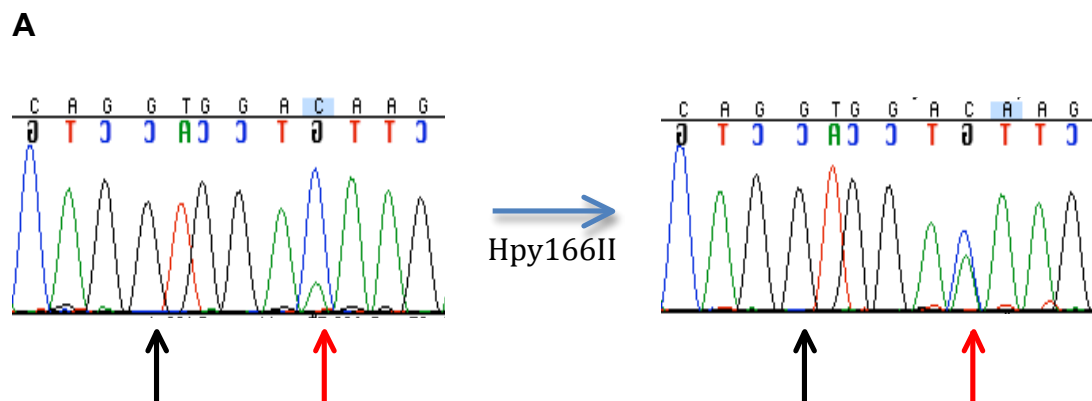

**B**

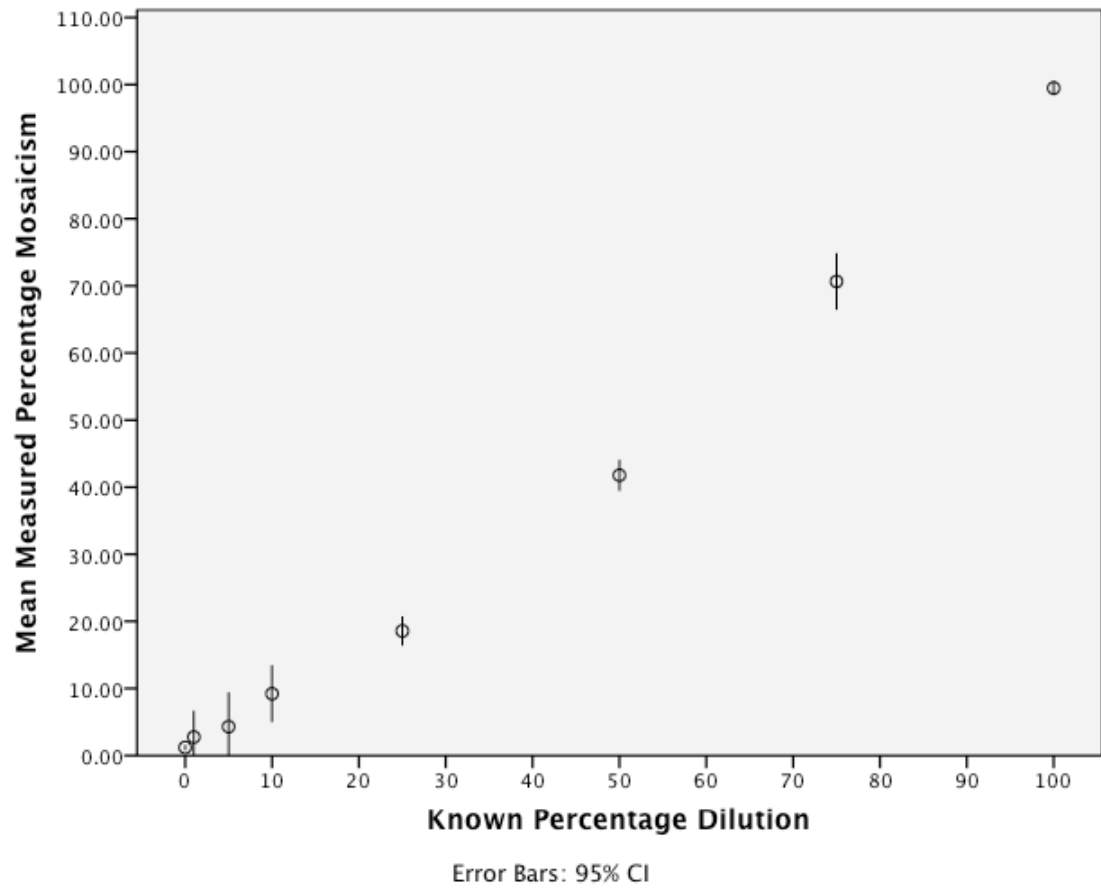

Supplement: jid201370x1.pdf [file jid201370x1.pdf]
